# Supplementary material
Source: publisher figshare collection journal article supplement (https://tandf.figshare.com/articles/dataset/_/1569735)
Supplement: Supplementary file 1 [file 1]

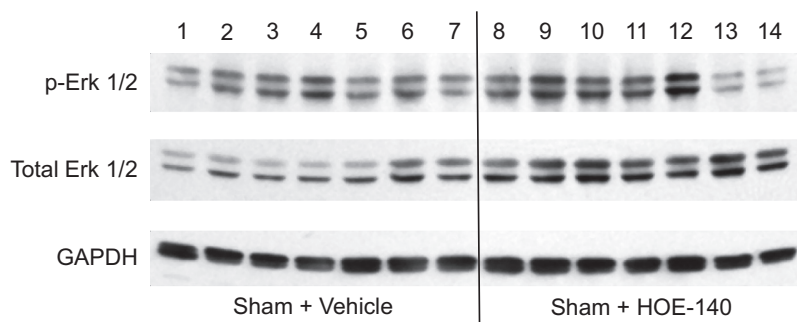

Supplementary Figure 5. Western blot analysis of Erk 1/2 phosphorylation at 1 month after HOE-140 treatment. Representative image of phosphorylated Erk 1/2, total Erk 1/2, and GAPDH in sham-irradiated + vehicle treatment and sham-irradiated + HOE-140 treatment.

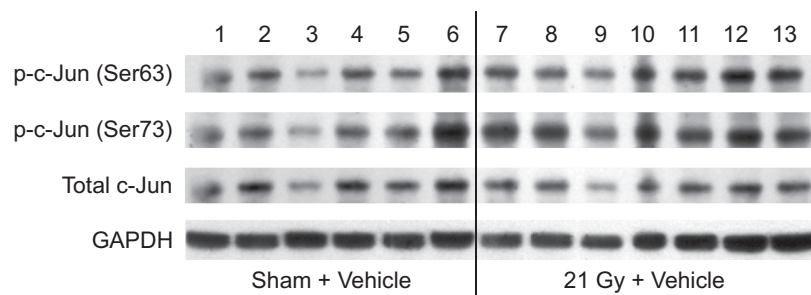

Supplementary Figure 6. Western blot analysis of c-Jun at 1 month after sham-irradiation or local heart irradiation with 21 Gy. Representative image of c-Jun phosphorylated at serine 63 or serine 73, total c-Jun, and GAPDH in sham-irradiated + vehicle treatment and 21 Gy + vehicle treatment.
