# Supplementary material
Source: publisher figshare collection journal article supplement (https://tandf.figshare.com/articles/dataset/_/1569735)
Supplement: Supplementary file 2 [file 1]

Archive with 2 entries (2 files):
- irab_a_1047041_sm0543.pdf
- irab_a_1047041_sm0551.pdf
